# Supplementary material for: Untangling the role of one-carbon metabolism in colorectal cancer risk: a comprehensive Bayesian network analysis
Source: PubMed Central journal article supplement (PMC5324061; doi:10.1038/srep43434), 2017-02-24
Supplement: srep43434-s1.pdf [file srep43434-s1.pdf]

**Untangling the role of one-carbon metabolism in colorectal cancer risk: a comprehensive Bayesian network analysis**

Robin Myte, Björn Gylling, Jenny Häggström, Jörn Schneede, Per Magne Ueland, Göran Hallmans, Ingegerd Johansson, Richard Palmqvist, Bethany Van Guelpen

**SUPPLEMENTARY MATERIALS**

**Supplementary Table S1** Genotype distributions of single nucleotide polymorphisms related to one-carbon metabolism in colorectal cancer cases and controls and tests of Hardy-Weinberg equilibrium.

**Supplementary Table S2** Strongest relations to CRC risk within subgroups.

**Supplementary Figure S1** Bivariate correlations between log-transformed plasma concentrations of one-carbon metabolites calculated with Spearman's correlation coefficient.

**Supplementary Table S1 Genotype distributions of single nucleotide polymorphisms related to one-carbon metabolism.**

| SNP                               |          | Genotype   |              |            | P <sub>HW</sub> <sup>a</sup> | P <sup>b</sup> | Missing (%) |
|-----------------------------------|----------|------------|--------------|------------|------------------------------|----------------|-------------|
|                                   |          | Common     | Heterozygous | Homozygous |                              |                |             |
| <i>CBS</i> 844ins68 <sup>c</sup>  | Cases    | 554 (91%)  | 54 (9%)      | 1 (0%)     | 1.000                        | 0.51           | 1           |
|                                   | Controls | 1045 (89%) | 125 (11%)    | 3 (0%)     | 1.000                        |                |             |
| <i>CBS</i> 699C>T                 | Cases    | 283 (47%)  | 257 (42%)    | 68 (11%)   | 0.447                        | 0.94           | 1           |
|                                   | Controls | 540 (46%)  | 504 (43%)    | 127 (11%)  | 0.598                        |                |             |
| <i>MTHFR</i> 677C>T               | Cases    | 326 (53%)  | 232 (38%)    | 53 (9%)    | 0.236                        | 0.23           | 0.6         |
|                                   | Controls | 580 (49%)  | 489 (41%)    | 112 (9%)   | 0.581                        |                |             |
| <i>MTHFR</i> 1298 A>C             | Cases    | 253 (41%)  | 275 (45%)    | 83 (14%)   | 0.594                        | 0.27           | 0.6         |
|                                   | Controls | 496 (42%)  | 556 (47%)    | 130 (11%)  | 0.179                        |                |             |
| <i>MTR</i> 2756A>G                | Cases    | 375 (62%)  | 192 (32%)    | 42 (7%)    | 0.017                        | 0.30           | 1           |
|                                   | Controls | 685 (58%)  | 413 (35%)    | 75 (6%)    | 0.260                        |                |             |
| <i>MTRR</i> 66A>G                 | Cases    | 108 (18%)  | 288 (47%)    | 211 (35%)  | 0.615                        | 0.32           | 1           |
|                                   | Controls | 195 (17%)  | 600 (51%)    | 376 (32%)  | 0.097                        |                |             |
| <i>MTRR</i> 524 C>T               | Cases    | 250 (42%)  | 275 (46%)    | 77 (13%)   | 0.968                        | 0.63           | 2           |
|                                   | Controls | 505 (44%)  | 521 (45%)    | 134 (12%)  | 0.973                        |                |             |
| <i>BHMT</i> 742 G>A               | Cases    | 297 (49%)  | 264 (43%)    | 47 (8%)    | 0.300                        | 0.89           | 2           |
|                                   | Controls | 580 (50%)  | 494 (42%)    | 94 (8%)    | 0.465                        |                |             |
| <i>TCII</i> 776 C>G               | Cases    | 220 (36%)  | 295 (49%)    | 93 (15%)   | 0.766                        | 0.54           | 1           |
|                                   | Controls | 432 (37%)  | 540 (46%)    | 199 (17%)  | 0.189                        |                |             |
| <i>TCII</i> 67 A>G                | Cases    | 439 (72%)  | 161 (26%)    | 8 (1%)     | 0.147                        | 0.31           | 1           |
|                                   | Controls | 835 (71%)  | 308 (26%)    | 28 (2%)    | 0.967                        |                |             |
| <i>RFC1</i> 80G>A                 | Cases    | 173 (29%)  | 268 (44%)    | 162 (27%)  | 0.008                        | 0.09           | 2           |
|                                   | Controls | 335 (29%)  | 571 (49%)    | 262 (22%)  | 0.558                        |                |             |
| <i>FOLR1</i> 1413G>A <sup>c</sup> | Cases    | 559 (92%)  | 47 (8%)      | 0 (0%)     | 1.000                        | 0.65           | 2           |
|                                   | Controls | 1065 (92%) | 94 (8%)      | 3 (0%)     | 0.468                        |                |             |
| <i>MTHFD1</i> 1958G>A             | Cases    | 156 (26%)  | 317 (52%)    | 136 (22%)  | 0.327                        | 0.18           | 1           |
|                                   | Controls | 347 (30%)  | 566 (48%)    | 260 (22%)  | 0.332                        |                |             |
| <i>CTH</i> 1364G>T                | Cases    | 366 (61%)  | 202 (34%)    | 34 (6%)    | 0.437                        | 0.80           | 2           |
|                                   | Controls | 688 (59%)  | 403 (35%)    | 71 (6%)    | 0.274                        |                |             |
| <i>SHMT1</i> 1420C>T              | Cases    | 285 (47%)  | 242 (40%)    | 77 (13%)   | 0.031                        | 1.00           | 2           |
|                                   | Controls | 553 (47%)  | 466 (40%)    | 148 (13%)  | 0.002                        |                |             |
| <i>DHFR</i> 19 del                | Cases    | 189 (32%)  | 291 (49%)    | 117 (20%)  | 0.841                        | 0.15           | 3           |
|                                   | Controls | 352 (31%)  | 525 (46%)    | 272 (24%)  | 0.006                        |                |             |
| <i>TYMS</i> 6 del                 | Cases    | 272 (45%)  | 245 (41%)    | 83 (14%)   | 0.027                        | 0.44           | 3           |
|                                   | Controls | 511 (44%)  | 499 (43%)    | 139 (12%)  | 0.339                        |                |             |

<sup>a</sup> From Chi-square test for Hardy-Weinberg equilibrium (Bonferroni-corrected threshold for significance = 0.05/34 ≈ 0.0015)

<sup>a</sup> From Chi-square test for difference in genotype distribution between cases and controls (Bonferroni-corrected threshold for significance = 0.05/17 ≈ 0.003).

<sup>c</sup> Expected cell counts in Chi-square test below 5, therefore P-values are from a Fisher's exact test.

**Supplementary Table S2 Strongest relations to CRC risk within subgroups.**

| Subgroup         | Cases/controls (n) | Top 3 variables (confidence) <sup>a</sup> |                       |                     | Threshold <sup>b</sup> |
|------------------|--------------------|-------------------------------------------|-----------------------|---------------------|------------------------|
| Males            | 253/487            | Folate<br>54%                             | B2<br>33%             | RFC1 80G>A<br>28%   | 50%                    |
| Females          | 360/703            | B2<br>40%                                 | MTHFD1 1958G>A<br>29% | DHFR 19 del<br>25%  | 51%                    |
| Follow-up <8.2 y | 306/584            | B6<br>33%                                 | DHFR 19 del<br>30%    | B2<br>20%           | 49%                    |
| Follow-up ≥8.2 y | 307/606            | Betaine<br>35%                            | Folate<br>31%         | RFC1 80G>A<br>26%   | 50%                    |
| Right Colon      | 183/357            | RFC1 80G>A<br>37%                         | Methionine<br>22%     | DHFR 19 del<br>21%  | 53%                    |
| Left Colon       | 215/419            | CBS 699C>T<br>41%                         | Folate<br>33%         | MTRR 66A>G<br>25%   | 52%                    |
| Rectum           | 214/412            | B12<br>51%                                | MTRR 66A>G<br>23%     | MTHFR 677C>T<br>22% | 51%                    |
| Stage I&II       | 308/600            | DHFR 19 del<br>40%                        | MTRR 66A>G<br>27%     | RFC1 80G>A<br>24%   | 49%                    |
| Stage III&IV     | 276/533            | Folate<br>57%                             | B2<br>27%             | Choline<br>25%      | 50%                    |

<sup>a</sup> Edge confidences to CRC in subgroups (i.e. frequency of the relation in the 1000 bootstrap samples), for the top three most influential one-carbon metabolism variables in Bayesian networks estimated using the HC algorithm.

<sup>b</sup> Threshold for an edge to be included in the final network estimated based on the observed distribution of edge confidences

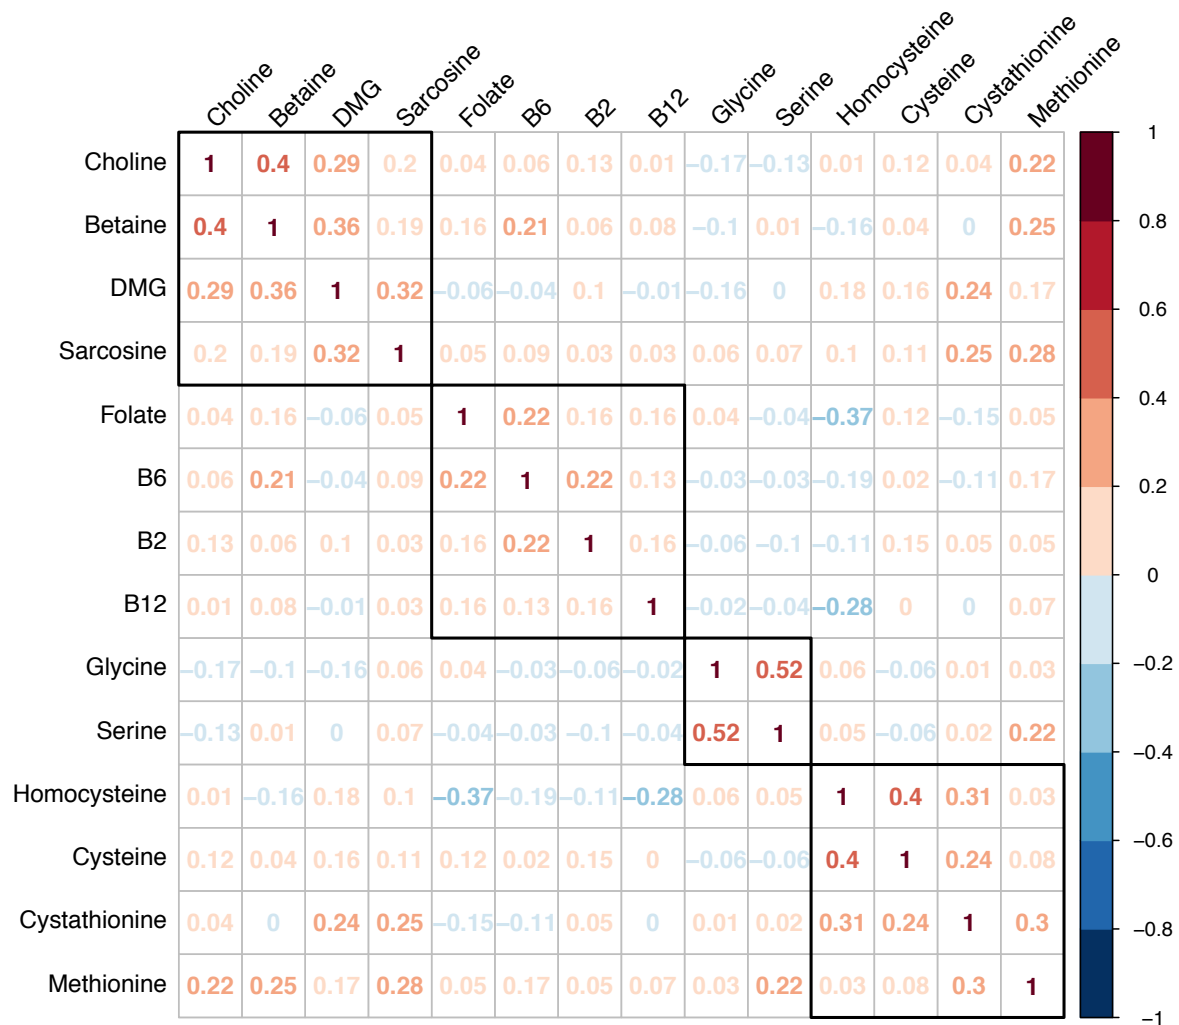

**Supplementary Figure S1 Correlations between plasma one-carbon metabolites.** Calculated with Spearman's correlation coefficient on pairwise complete observations. Rectangles represent four clusters from a hierarchical cluster analysis using Spearman's correlation as distance measure with complete linkage. Abbreviations: DMG, dimethylglycine - B6, vitamin B6 (PLP, pyridoxal 5' phosphate) - B2, vitamin B2 (riboflavin) - B12, vitamin B12 (cobalamin).
